# Supplementary material
Source: Royal Society of Chemistry journal article supplement (https://www.rsc.org/suppdata/cc/1999/877/901590f.doc)
Supplement: Supplementary file 1 [file 901590f.doc]

**Supplementary Material: Hybrid Organic-Inorganic, Hexa-arm Dendrimers Based on an Mo6Cl8 Core**

Christopher B. Gorman[[1]](#footnote-2)*, Wendy Y. Su, Hongwei Jiang,

Christopher M. Watson, and Paul Boyle

Box 8204

Department of Chemistry

North Carolina State University

Raleigh, NC 27695

# Experimental

**Instrumentation**: Nuclear magnetic resonance characterization was performed at 300 MHz (1H) or 75 MHz (13C) on a GE-NMR system. Chemical shifts were referenced to the chemical shift of the residual protons in solvent. Elemental analysis was performed by Atlantic Microlabs (Norcross, GA). Ultraviolet-visible absorption spectroscopy was performed on a HP8452A diode array spectrometer . Samples were run under inert atmosphere at 1x 10-5 M concentration. Electrospray ionization mass spectrometry (ESI) and matrix assisted laser desorption ionization time of flight mass spectrometry (MALDI-TOF) were completed by the Mass Spectrometry facility at NCSU. Spectra for MALDI-TOF were obtained with a number of matrices but the best signal intensities were obtained with a 2:1 ratio of Dithranol (1,8,9-Anthracenetriol) to cluster and likewise with a 2:1 ratio of POPOP (1,4-Bis(5-phenyloxazol-2-yl)benzene to cluster. ESI spectra were obtained from THF solution using acetonitrile as carrier solvent.

**Materials**: Tetrahydrofuran and diethyl ether were distilled from sodium benzophenone ketyl. Methylene chloride was distilled from calcium hydride. Toluene was distilled from sodium. Methanol was distilled from magnesium turnings and stored over 4Å sieves. All solvents were degassed prior to use in the drybox. All reactions were run under a nitrogen atmosphere. Flash chromatography was run on 230-400 mesh silica gel (Merck). *Para*-methoxy phenol (**L0**) was recrystallized from petroleum ether and dried overnight over potassium pentoxide in a vacuum oven. Dendritic mesylates of the first and second generation were prepared as described previously.1 The molecules ((nBu4N)2[Mo6Cl8(OSO2CF3)6])2 and (Na2[Mo6Cl8(OMe)6])3 were prepared as described previously. All other reagents were purchased from Alfa Aesar, Fisher, and Aldrich and were used as received unless otherwise noted.

**Mono-methoxymethyl hydroquinone**: To a mixture of hydroquinone (2.5 g, 22.7 mmol), dimethylamino pyridine (DMAP) (0.27 g, 0.09 mmol), and *N,N*-diisopropyl ethylamine (5.8 g, 18.0 mmol) in CH2Cl2/THF (50 ml/25 ml) at 0 °C, chloromethyl methyl ether (MOMCl) (3.6 g, 45.0 mmol ) was added dropwise over 10 min with stirring. The resulting mixture was warmed to room temperature, and then heated to reflux overnight. After cooling to room temperature, the reaction mixture was washed with brine (3 x 20 ml) and water (2 x 20 ml), and then dried over Na2SO4. The pale orange oily product was obtained by flash chromatography eluting with ethyl ether/petroleum ether (1:3), yield: 54%. 1H NMR (acetone-*d6*, ppm)  3.41 (s, 3H, CH3), 5.06 (s, 2H, CH2), 6.67 (m, 2H, C6H4), 6.84 (m, 2H, C6H4), 7.95 (s, 1H, OH). 13C NMR (acetone-*d6*, ppm)  55.58, 95.87, 116.39, 118.42, 151.35, 153.03. HRMS Calc’d for C8H10O3 154.0630, found 154.0625  = 3.4 ppm.

**L1-MOM** and **L2-MOM** (e.g. Scheme I, result of step 1): A general procedure for the synthesis of **L1-MOM** and **L2-MOM** is outlined below:

**L1-MOM**: A mixture of first generation dendritic mesylate (3.0 g, 5.66 mmol), mono-methoxymethyl hydroquinone (1.1 g, 7.3 mmol), potassium carbonate (4.7 g, 44 mmol) and 18-crown-6 (0.30 g, 1.13 mmol) in 100 ml of acetone was refluxed under nitrogen for 70 h. After cooling to room temperature, the solvent was removed under reduced pressure. The residue was dissolved in 50 ml of ethyl ether, and the organic layer was washed with water (3  15 ml), and then dried over Na2SO4. The crude product was purified by flash chromatography (CH2Cl2), yield: 75%. 1H NMR (CDCl3, ppm)  1.58 (m, 2H, CH2), 1.62 (s, 3H,CH3), 2.21 (m, 2H, CH2), 3.83 (t, 2H, OCH2, JH-H = 6.6 Hz), 5.02 (s, 4H, C6H4-CH2-O), 5.06 (s, 2H, OCH2O), 6.78 (m, 2H, C6H4), 6.88 (m, 4H, C6H4), 6.95 (m, 2H, C6H), 7.13 (m, 4H, C6H4), 7.29 - 7.45 (m, 10H, C6H5). 13C NMR (CDCl3, ppm)  25.66, 28.63, 39.02, 45.50, 56.55, 69.60, 70.67, 96.01, 114.84, 115.97, 118.23, 128.25, 128.60, 128.99, 129.25, 137.88, 142.73, 151.87, 154.87, 157.40. Anal calc’d for C39H40O5 (588.74): C, 79.56%; H, 6.85%. Found C, 79.65%; H, 6.86%.

**L2-MOM**: yield: 75%. 1H NMR (CDCl3, ppm)  1.52 (m, 6H, CH2), 1.57 (s, 3H,CH3), 1.61 (s, 6H, CH3), 2.15 (m, 6H, CH2CH2O), 2.46 (s, 3H, OCH3), 3.83 (m, 6H, OCH2), 3.29 (t, 4H, CH2O, JH-H = 6.4 Hz), 4.98 (s, 8H, C6H4-CH2-O), 5.07 (s, 2H, OCH2O), 6.72 (m, 4H, C6H4), 6.85 (d, 4H, C6H4, JH-H = 8.2 Hz), 6.92 (d, 2H, C6H4, JH-H = 8.6 Hz), 7.06 (m, 4H, C6H4, JH-H = 8.6 Hz), 7.10 (d, 4H, C6H, JH-H = 8.2 Hz), 7.28 - 7.42 (m, 20H, C6H5). 13C NMR (CDCl3, ppm)  25.60, 28.57, 38.97, 45.44, 56.45, 68.89, 69.54, 70.61, 77.20, 77.62, 77.84, 78.04, 95.94, 114.36, 114.75, 115.88, 118.17, 128.15, 128.54, 128.83, 128.90, 129.19, 137.78, 142.28, 142.66, 151.77, 154.81, 157.33, 157.49. Anal calc’d for C87H88O9 (1277.64): C, 81.79%; H, 6.94%. Found C, 81.52%; H, 6.92%.

**L1-OH** and **L2-OH** (e.g. result of Scheme I, step 2): (a common procedure for synthesizing **L1-OH** and **L2-OH**): To a solution of **L1-MOM** (2.5g, 42.5 mmol) in 20 ml of THF, 100 ml of methanol and 0.5 ml of concentrated HCl were added. The resulting mixture was refluxed under nitrogen for 16 h. The solvent was removed and the residue was dissolved into 50 ml of dichloromethane. The organic layer was washed with water (3  20 ml), and dried over Na2SO4. The product was purified by flash chromatography (CH2Cl2), yield: 91%. 1H NMR (DMSO-*d6*, ppm)  1.41 (m, 2H, CH2), 1.52 (s, 3H,CH3), 2.08 (m, 2H, CH2), 3.77 (t, 2H, OCH2, JH-H = 6.6 Hz), 4.99 (s, 4H, C6H4-CH2-O), 6.38 (m, 4H, C6H4), 6.68 (d, 4H, C6H4, JH-H = 8.1 Hz), 7.01 (m, 4H, C6H), 7.29 - 7.43 (m, 10H, C6H5), 8.84 (s, 1H, OH). 13C NMR (DMSO-*d6*, ppm)  124.67, 27.38, 37.53, 44.19, 58.23, 69.10, 114.04, 115.31, 115.63, 127.65, 127.75, 127.91, 128.36, 137.18, 141.57, 151.04, 151.33, 156.12. Anal calc’d for C37H36O4 (544.69): C, 81.59%; H, 6.66%. Found C, 81.43%; H, 6.73%.

**L2-OH**: yield: 95%. 1H NMR (DMSO-*d6*, ppm)  1.38 (m, 6H, CH2), 1.46 (s, 3H,CH3), 1.48 (s, 6H, CH3), 2.04 (m, 6H, CH2CH2O), 3.22 (t, 2H, OCH2, JH-H = 6.6 Hz), 3.29 (t, 4H, CH2O, JH-H = 6.4 Hz), 4.98 (s, 8H, C6H4-CH2-O), 6.57 (m, 4H, C6H4), 6.68 (d, 2H, C6H4, JH-H = 8.6 Hz), 6.83 (d, 4H, C6H4, JH-H = 8.2 Hz), 6.87 (d, 2H, C6H4, JH-H = 8.6 Hz), 7.21 (d, 4H, C6H, JH-H = 8.2 Hz), 7.24 - 7.38 (m, 20H, C6H5), 8.79 (s, 1H, OH). 13C NMR (DMSO-*d6*, ppm)  25.79, 28.57, 38.65, 45.30, 45.37, 68.79, 70.25, 114.87, 115.23, 116.46, 116.78, 128.83, 128.93, 128.99, 129.09, 129.54, 138.33, 142.40, 142.73, 152.16, 152.48, 157.27. Anal calc’d for C85H84O8 (1233.59): C, 82.76%; H, 6.86%. Found C, 82.58%; H, 6.80%.

Clusters Na2**G0,** Na2**G1** andNa2**G2** were prepared by a general procedure reported below for Na2**G1**: To a suspension of Na2[Mo6Cl8(OCH3)6] (80 mg, 0.073 mmol) in a solution of L**1-OH** (260 mg, 0.47 mmol) in *ortho-*dichlorobenzene (3 ml), 3 ml of anhydrous methanol was added with stirring. The resulting mixture became clear immediately, and was further stirred overnight under vacuum maintained at 100 torr. This allowed solvents and by-product methanol to be removed slowly, and a yellow solid was left. The residue was dissolved into 4 ml of toluene, and filtered under nitrogen to remove the unreacted starting cluster, and then 10 ml of ethyl ether was added to the filtrate. The precipitate was collected and washed with ethyl ether. The product was further purified by precipitation from toluene/ether several times (yield: 92%). 1H NMR (DMSO-*d6*, ppm)  1.39 (br, 12H, CH2), 1.51 (s, 18H,CH3), 2.09 (br, 12H, CH2CH2O), 3.74 (br, 12H, CH2O), ), 5.01 (s, 24H, C6H4-CH2-O), 6.37 (d, 12H, C6H4, JH-H = 8.6 Hz), 6.56 (d, 12H, C6H4, JH-H = 8.6 Hz), 6.88 (d, 12H, C6H4, JH-H = 8.1 Hz), 7.07 (d, 12H, C6H4, JH-H = 8.1 Hz), 7.07 ñ 7.42 (m, 60H, C6H5). 13C NMR (DMSO-*d6*, ppm)  28.57, 45.37, 69.44, 70.25, 115.19, 115.97, 121,50, 128.83, 129.09, 129.51, 138.36, 142.79, 150.51, 157.27, 164.28. UV-VIS (CH2Cl2) max (nm) 232 (= 2.28  104 cm-1M-1), 286 (= 1.25  104 cm-1M-1).Anal calc’d for C222H210Cl8Mo6Na2O24 (4167.34): C, 63.98%; H, 5.08% found C, 63.80%; H, 5.20%. ESI-MS:(*m/z)* 2060.0 found, 2060.7 calc’d for Mo6Cl8(C37H35O4)62- for z = 2

Na2**G2**: yield: 95%. 1H NMR (DMSO-*d6*, ppm)  1.39 (br, 36H, CH2), 1.44 (s, 18H,CH3), 1.48 (s, 36H, CH3), 2.06 (br, 36H, CH2CH2O), 3.69 (br, 12H, OCH2), 3.76 (br, 24H, CH2O), 4.99 (s, 48H, C6H4-CH2-O), 6.38 (d, 12H, C6H4, JH-H = 8.6 Hz), 6.53 (d, 12H, C6H4, JH-H = 8.6 Hz), 6.68 (d, 24H, C6H4, JH-H = 8.1 Hz), 7.01 (m, 36H, C6H), 7.24 - 7.40 (m, 120H, C6H5). 13C NMR (DMSO*-d6*, ppm) 22.14, 25.72, 28.50, 114.77, 115.13, 115.91, 121.46, 126.44, 128.32, 128.70, 128.83, 129.02, 129.48, 130.02, 138.27, 142.40, 142.66, 157.23, 157.36 UV-VIS (CH2Cl2) max (nm) 232 (= 4.49  104 cm-1M-1), 286 (= 1.05  104 cm-1M-1).Anal calc’d for C510H498Cl8Mo6Na2O48 (8300.86): C, 73.79%; H, 6.04% found C, 73.94%; H, 6.31%.

Na2**G0**: was prepared similarly except DMF was used in the place of *ortho*-dichlorobenzene yield: 98%. 1H NMR (DMSO-*d6*, ppm)  3.58 (s, 18H, CH3), 6.37 (m, 12H, C6H4), 6.60 (m, 12H, C6H4). 13C NMR (DMSO*-d6*, ppm) . 56.32, 115.13, 121.46, 151.19, 164.2. UV-VIS (CH2Cl2) max (nm) 232 (= 2.07  104 cm-1M-1), 302 (= 1.30  104 cm-1M-1). ESI-MS (*m/z)* 798.7 found, 799.0 calc’d for Mo6Cl8(C7H7O2)62- for z = 2.

Clusters (*n*Bu4N)2**G0** and(*n*Bu4N)2**G1** were prepared by a general procedure reported below: In a nitrogen-filled glovebox, the **Lx-OH** (x = 0, 1) dendron ligand was added to vial containing a slurry of an excess of KH (1.3 eq) in THF. The reaction was stirred at room temperature for approximately 30 minutes and then filtered with a 0.2 µm filter. This anion was reacted in a (10:1) ratio with (nBu4N)2Mo6Cl8(OSO2CF3)6 by taking the anion and cluster up in ≈ 5 ml of THF/100 mg cluster. Near the end of the addition, a white precipitate formed but eventually redissolved with continuous stirring. As the generation of the ligand increased, lesser amounts of this white precipitate were observed to form. Stirring times were varied from 30 minutes (for formation of (*n*Bu4N)2**G0**) to overnight (for formation of (*n*Bu4N)2**G1**). When the reaction was complete, the volume of the solution was concentrated and an excess of toluene (≈ 2.5 fold) was added directly to the solution to selectively precipitate the potassium triflate byproduct. Once the potassum triflate salt precipitated, the reaction solution was filtered with a 0.2 µm filter followed with an addition of excess Et2O (≈ 25 mL) which precipitated the desired product upon standing. Synthesis of the molecule (*n*Bu4N)2**G2** was also attempted by this route, but 1H NMR indicated incomplete ligand exchange even when excessively long reaction times were employed.

(*n*Bu4N)2**G0**: (yield: 88 % after first precipitation, 43% after second precipitation). 1HNMR(DMSO-*d6*, ppm)  0.94-0.89 (t, 24H, CH3CH2CH2CH2N, JH-H =7.3 Hz),  1.33-1.26 (m, 16H, CH3CH2CH2CH2N),  1.58-1.52 (m, 16H, CH3CH2CH2CH2N),  3.17-3.12 (br, 16H, CH3CH2CH2CH2N),  3.61 (s, 18H, OCH3),  6.62-6.37 (m, 24H, C6H4) 13C NMR(DMSO-*d6*, ppm)  150.08, 120.39, 114.02, 57.51, 55.25, 23.39, 19.22, 13.53.UV-VIS (CH2Cl2) max (nm) 232 (= 2.35  104 cm-1M-1), 282 (= 1.04  104 cm-1M-1). ESI-MS (*m/z)* 798.2 found, 799.0 calc’d for Mo6Cl8(C7H7O2)62- for z = 2. Anal calc’d for C74H114Cl8Mo6N2O12 (2083) C, 42.67%; H, 5.51%; N: 1.34% found C, 42.77%; H, 5.53%, N, 1.31%.

(*n*Bu4N)2**G1** (yield: 23% after two precipitations). 1HNMR(DMSO-*d6*, ppm)  0.94-0.89 (t, 24H, CH3CH2CH2CH2N, JH-H =7.3 Hz),  1.37-1.26 (br, 32H, CH3CH2CH2CH2N),  1.50 (s, 18H, CH3),  1.58-1.50 (m, 12H, CH2CH2CH20),  2.08 (br, 12H, CH2CH2CH20),  3.17-3.12 (br, 16H, CH3CH2CH2CH2N),  3.73(br, 12H CH2CH2CH20)  5.00 (s, 24H, C6H4-CH2-O),  6.44 (d, 12H, C6H4,JH-H= 8.8Hz),  6.96 (d, 24H, C6H4, JH-H= 9.5Hz)  7.42-7.28 (d, 60H, C6H5, JH-H= 9.5Hz). 13C NMR(DMSO-*d6*, ppm)  156.13, 149.37, 141.65, 137.26, 128.40, 115.67, 115.35, 127.95, 127.76, 127.69, 120.39, 114.83, 114.05, 69.11, 68.3, 57.51,44.26, 27.46, 24.87, 23.03, 19.22, 13.50. UV-VIS (CH2Cl2) max (nm) 236 (= 3.27  104 cm-1M-1), 278 (= 1.32  104 cm-1M-1). ESI-MS:(*m/z)* 2060.3 found, 2060.7 calc’d for Mo6Cl8(C37H35O4)62- for z = 2.

**Supplementary Material References**

(1) Chen, K.-Y.; Gorman, C. B. *J. Org. Chem.* **1996**, *61*, 9229-9235.

(2) Johnston, D. H.; Gaswick, D. C.; Lonergan, M. C.; Stern, C. L.; Shriver, D. F. *Inorg. Chem.* **1992**, *31*, 1869-1873.

(3) Nannelli, P.; Block, B. P. *Inorg. Synth.* **1971**, *13*, 99-103.

1. * Author to which correspondence should be addressed. Telephone Number (919)-515-4252 (voice), (919)-515-8920 (fax). Email: Chris_Gorman@ncsu.edu [↑](#footnote-ref-2)
